# Supplementary material for: Molecular insight into the anion effect and free volume effect of CO2solubility in multivalent ionic liquids
Source: Royal Society of Chemistry journal article supplement (doi:10.1039/d0cp03424j), 2020-01-01
Supplement: d0cp03424j1.pdf [file d0cp03424j1.pdf]

## ***Supporting Information***

### **Molecular Insight into the Anion Effect and Free Volume Effect of CO<sub>2</sub> Solubility in Multivalent Ionic Liquids**

*Xiaoyang Liu, Kathryn E. O'Harra, Jason E. Bara, C. Heath Turner\**,

Department of Chemical and Biological Engineering, The University of Alabama,  
Tuscaloosa, AL 35487, USA

\*E-mail: hturner@eng.ua.edu

**Optimized structures and calculated charges using different charge-assignment schemes: Hirshfeld,<sup>1</sup> ChelpG,<sup>2</sup> NBO,<sup>3</sup> and CM5.<sup>4</sup>**

**Table S1-1** Atomic charge (units of e) and atomic coordinates of **C1** ([Bzmim<sub>2</sub>]<sup>2+</sup>). The atoms in bold font are used in the RDF calculations: the most positively-charged atom (C); H-bonds (H); and the most negatively-charged atom (N).

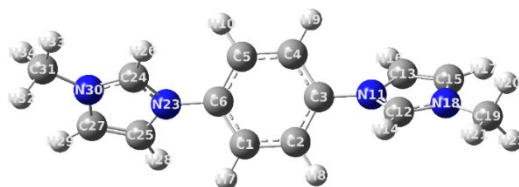

| No.       | Atom     | Hirshfeld | ChelpG | NBO   | CM5   | 0.8*ChelpG | 1.2*CM5      | Coordinates                     |
|-----------|----------|-----------|--------|-------|-------|------------|--------------|---------------------------------|
| 1         | C        | -0.01     | -0.12  | -0.17 | -0.06 | -0.09      | -0.07        | C -0.628000 -1.251000 -0.151000 |
| 2         | C        | -0.01     | -0.12  | -0.17 | -0.06 | -0.09      | -0.07        | C 0.761000 -1.174000 -0.165000  |
| 3         | C        | 0.06      | 0.16   | 0.14  | 0.11  | 0.13       | 0.13         | C 1.378000 0.076000 -0.156000   |
| 4         | C        | -0.01     | -0.12  | -0.17 | -0.06 | -0.09      | -0.07        | C 0.628000 1.251000 -0.151000   |
| 5         | C        | -0.01     | -0.12  | -0.17 | -0.06 | -0.09      | -0.07        | C -0.761000 1.174000 -0.165000  |
| 6         | C        | 0.06      | 0.16   | 0.14  | 0.11  | 0.13       | 0.13         | C -1.378000 -0.076000 -0.156000 |
| 7         | H        | 0.07      | 0.15   | 0.24  | 0.13  | 0.12       | 0.16         | H -1.115000 -2.218000 -0.138000 |
| 8         | H        | 0.07      | 0.15   | 0.24  | 0.13  | 0.12       | 0.15         | H 1.350000 -2.083000 -0.194000  |
| 9         | H        | 0.07      | 0.15   | 0.24  | 0.13  | 0.12       | 0.16         | H 1.115000 2.218000 -0.137000   |
| 10        | H        | 0.07      | 0.15   | 0.24  | 0.13  | 0.12       | 0.15         | H -1.350000 2.083000 -0.194000  |
| 11        | N        | 0.04      | 0.01   | -0.36 | -0.21 | 0.00       | -0.25        | N 2.817000 0.162000 -0.172000   |
| 12        | C        | 0.11      | 0.01   | 0.30  | 0.21  | 0.01       | 0.26         | C 3.650000 -0.442000 0.695000   |
| 13        | C        | 0.03      | -0.06  | 0.00  | 0.05  | -0.05      | 0.07         | C 3.581000 0.880000 -1.082000   |
| 14        | H        | 0.10      | 0.17   | 0.24  | 0.17  | 0.14       | 0.21         | H 3.349000 -1.051000 1.532000   |
| 15        | C        | 0.04      | -0.12  | 0.01  | 0.06  | -0.09      | 0.07         | C 4.884000 0.691000 -0.743000   |
| 16        | H        | 0.09      | 0.18   | 0.25  | 0.16  | 0.15       | 0.19         | H 3.138000 1.433000 -1.893000   |
| 17        | H        | 0.10      | 0.21   | 0.26  | 0.17  | 0.17       | 0.20         | H 5.787000 1.063000 -1.198000   |
| 18        | N        | 0.05      | 0.15   | -0.33 | -0.22 | 0.12       | -0.26        | N 4.904000 -0.136000 0.366000   |
| 19        | C        | 0.02      | -0.23  | -0.35 | -0.07 | -0.18      | -0.09        | C 6.120000 -0.590000 1.070000   |
| 20        | H        | 0.08      | 0.15   | 0.24  | 0.14  | 0.12       | 0.17         | H 6.661000 0.277000 1.445000    |
| 21        | H        | 0.08      | 0.15   | 0.23  | 0.14  | 0.12       | 0.16         | H 5.829000 -1.227000 1.902000   |
| 22        | H        | 0.08      | 0.15   | 0.24  | 0.14  | 0.12       | 0.17         | H 6.744000 -1.154000 0.378000   |
| 23        | N        | 0.04      | 0.01   | -0.36 | -0.21 | 0.00       | -0.25        | N -2.817000 -0.162000 -0.172000 |
| <b>24</b> | <b>C</b> | 0.11      | 0.01   | 0.30  | 0.21  | 0.01       | <b>0.26</b>  | C -3.650000 0.442000 0.695000   |
| 25        | C        | 0.03      | -0.06  | 0.00  | 0.05  | -0.05      | 0.07         | C -3.581000 -0.880000 -1.082000 |
| <b>26</b> | <b>H</b> | 0.10      | 0.17   | 0.24  | 0.17  | 0.14       | <b>0.21</b>  | H -3.349000 1.051000 1.532000   |
| 27        | C        | 0.04      | -0.12  | 0.01  | 0.06  | -0.09      | 0.07         | C -4.884000 -0.691000 -0.743000 |
| 28        | H        | 0.09      | 0.18   | 0.25  | 0.16  | 0.15       | 0.19         | H -3.138000 -1.433000 -1.893000 |
| 29        | H        | 0.10      | 0.21   | 0.26  | 0.17  | 0.17       | 0.20         | H -5.787000 -1.063000 -1.198000 |
| <b>30</b> | <b>N</b> | 0.05      | 0.15   | -0.33 | -0.22 | 0.12       | <b>-0.26</b> | N -4.904000 0.136000 0.366000   |
| 31        | C        | 0.02      | -0.23  | -0.35 | -0.07 | -0.18      | -0.09        | C -6.120000 0.590000 1.070000   |
| 32        | H        | 0.08      | 0.15   | 0.24  | 0.14  | 0.12       | 0.17         | H -6.661000 -0.277000 1.445000  |
| 33        | H        | 0.08      | 0.15   | 0.23  | 0.14  | 0.12       | 0.16         | H -5.829000 1.227000 1.902000   |
| 34        | H        | 0.08      | 0.15   | 0.24  | 0.14  | 0.12       | 0.17         | H -6.744000 1.154000 0.378000   |

**Table S1-2.** Atomic charge (units of e) and atomic coordinates of **C2** ([Bzmim<sub>3</sub>]<sup>3+</sup>). The atoms in bold font are used in the RDF calculations: the most positively-charged atom (C); H-bonds (H); and the most negatively-charged atom (N).

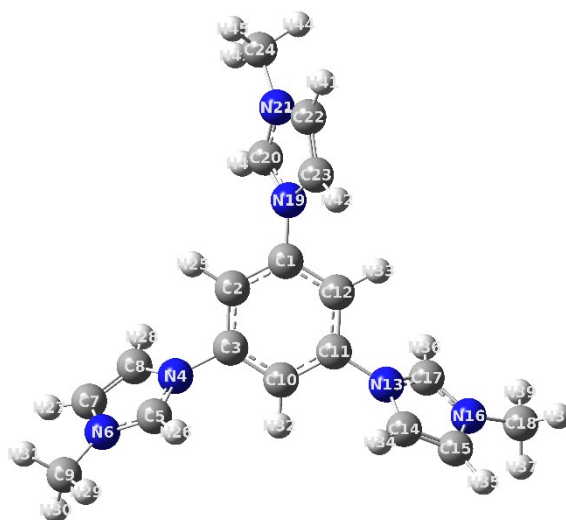

| No.       | Atom     | Hirshfeld | ChelpG | NBO   | CM5   | 0.8*ChelpG | 1.2*CM5      | Coordinates |           |           |           |
|-----------|----------|-----------|--------|-------|-------|------------|--------------|-------------|-----------|-----------|-----------|
| 1         | C        | 0.07      | 0.13   | 0.31  | 0.12  | 0.10       | 0.14         | C           | 0.279000  | 1.348000  | 0.141000  |
| 2         | C        | -0.01     | -0.13  | -0.21 | -0.05 | -0.10      | -0.06        | C           | -1.043000 | 0.928000  | 0.004000  |
| 3         | C        | 0.07      | 0.13   | 0.15  | 0.12  | 0.11       | 0.14         | C           | -1.310000 | -0.439000 | -0.093000 |
| 4         | N        | 0.03      | 0.09   | -0.38 | -0.22 | 0.08       | -0.26        | N           | -2.673000 | -0.877000 | -0.254000 |
| <b>5</b>  | <b>C</b> | 0.12      | 0.00   | 0.31  | 0.21  | 0.00       | <b>0.26</b>  | C           | -3.379000 | -1.615000 | 0.631000  |
| <b>6</b>  | <b>N</b> | 0.06      | 0.11   | -0.32 | -0.21 | 0.09       | <b>-0.25</b> | N           | -4.598000 | -1.817000 | 0.139000  |
| 7         | C        | 0.05      | -0.08  | 0.02  | 0.07  | -0.06      | 0.09         | C           | -4.691000 | -1.197000 | -1.095000 |
| 8         | C        | 0.03      | -0.11  | 0.00  | 0.05  | -0.08      | 0.06         | C           | -3.494000 | -0.607000 | -1.346000 |
| 9         | C        | 0.02      | -0.22  | -0.35 | -0.07 | -0.17      | -0.08        | C           | -5.689000 | -2.570000 | 0.798000  |
| 10        | C        | -0.01     | -0.17  | -0.14 | -0.05 | -0.13      | -0.06        | C           | -0.282000 | -1.380000 | -0.049000 |
| 11        | C        | 0.07      | 0.16   | 0.15  | 0.12  | 0.13       | 0.14         | C           | 1.032000  | -0.934000 | 0.103000  |
| 12        | C        | -0.01     | -0.17  | -0.22 | -0.05 | -0.14      | -0.06        | C           | 1.326000  | 0.426000  | 0.197000  |
| 13        | N        | 0.03      | 0.09   | -0.38 | -0.22 | 0.07       | -0.26        | N           | 2.099000  | -1.900000 | 0.154000  |
| 14        | C        | 0.03      | -0.11  | 0.00  | 0.05  | -0.09      | 0.06         | C           | 2.258000  | -2.890000 | 1.122000  |
| 15        | C        | 0.05      | -0.07  | 0.02  | 0.07  | -0.05      | 0.09         | C           | 3.381000  | -3.582000 | 0.797000  |
| 16        | N        | 0.06      | 0.11   | -0.32 | -0.21 | 0.09       | -0.25        | N           | 3.896000  | -3.018000 | -0.357000 |
| 17        | C        | 0.12      | -0.01  | 0.31  | 0.21  | -0.01      | 0.26         | C           | 3.115000  | -2.010000 | -0.731000 |
| 18        | C        | 0.02      | -0.20  | -0.35 | -0.07 | -0.16      | -0.08        | C           | 5.115000  | -3.481000 | -1.061000 |
| 19        | N        | 0.03      | 0.09   | -0.41 | -0.22 | 0.07       | -0.26        | N           | 0.575000  | 2.750000  | 0.283000  |
| 20        | C        | 0.12      | -0.01  | 0.30  | 0.21  | -0.01      | 0.26         | C           | 0.273000  | 3.723000  | -0.606000 |
| 21        | N        | 0.06      | 0.12   | -0.32 | -0.21 | 0.09       | -0.25        | N           | 0.703000  | 4.885000  | -0.125000 |
| 22        | C        | 0.05      | -0.07  | 0.02  | 0.07  | -0.06      | 0.09         | C           | 1.300000  | 4.669000  | 1.105000  |
| 23        | C        | 0.03      | -0.11  | 0.00  | 0.05  | -0.09      | 0.06         | C           | 1.225000  | 3.338000  | 1.366000  |
| 24        | C        | 0.02      | -0.22  | -0.35 | -0.07 | -0.18      | -0.08        | C           | 0.580000  | 6.202000  | -0.792000 |
| 25        | H        | 0.08      | 0.13   | 0.25  | 0.14  | 0.11       | 0.17         | H           | -1.856000 | 1.646000  | 0.008000  |
| <b>26</b> | <b>H</b> | 0.11      | 0.18   | 0.25  | 0.18  | 0.14       | <b>0.21</b>  | H           | -3.023000 | -1.959000 | 1.588000  |
| 27        | H        | 0.11      | 0.22   | 0.27  | 0.18  | 0.18       | 0.21         | H           | -5.590000 | -1.235000 | -1.689000 |
| 28        | H        | 0.09      | 0.19   | 0.25  | 0.16  | 0.15       | 0.19         | H           | -3.150000 | -0.052000 | -2.203000 |
| 29        | H        | 0.08      | 0.16   | 0.23  | 0.14  | 0.13       | 0.17         | H           | -5.333000 | -2.942000 | 1.757000  |

|    |   |      |      |      |      |      |      |   |           |           |           |
|----|---|------|------|------|------|------|------|---|-----------|-----------|-----------|
| 30 | H | 0.09 | 0.16 | 0.24 | 0.15 | 0.13 | 0.18 | H | -5.978000 | -3.405000 | 0.162000  |
| 31 | H | 0.09 | 0.16 | 0.24 | 0.15 | 0.13 | 0.18 | H | -6.537000 | -1.903000 | 0.954000  |
| 32 | H | 0.08 | 0.14 | 0.25 | 0.14 | 0.12 | 0.17 | H | -0.495000 | -2.437000 | -0.159000 |
| 33 | H | 0.08 | 0.15 | 0.25 | 0.14 | 0.12 | 0.17 | H | 2.349000  | 0.762000  | 0.320000  |
| 34 | H | 0.09 | 0.19 | 0.25 | 0.16 | 0.15 | 0.19 | H | 1.585000  | -2.995000 | 1.956000  |
| 35 | H | 0.11 | 0.22 | 0.27 | 0.18 | 0.17 | 0.21 | H | 3.857000  | -4.414000 | 1.290000  |
| 36 | H | 0.11 | 0.18 | 0.25 | 0.18 | 0.14 | 0.21 | H | 3.252000  | -1.398000 | -1.608000 |
| 37 | H | 0.09 | 0.16 | 0.24 | 0.15 | 0.13 | 0.18 | H | 4.975000  | -4.516000 | -1.369000 |
| 38 | H | 0.09 | 0.16 | 0.24 | 0.15 | 0.13 | 0.18 | H | 5.966000  | -3.400000 | -0.385000 |
| 39 | H | 0.08 | 0.16 | 0.23 | 0.14 | 0.12 | 0.17 | H | 5.278000  | -2.855000 | -1.935000 |
| 40 | H | 0.10 | 0.18 | 0.25 | 0.18 | 0.15 | 0.21 | H | -0.209000 | 3.576000  | -1.559000 |
| 41 | H | 0.11 | 0.22 | 0.27 | 0.18 | 0.17 | 0.21 | H | 1.715000  | 5.474000  | 1.690000  |
| 42 | H | 0.10 | 0.19 | 0.25 | 0.16 | 0.15 | 0.19 | H | 1.544000  | 2.772000  | 2.224000  |
| 43 | H | 0.08 | 0.16 | 0.23 | 0.14 | 0.13 | 0.17 | H | 0.072000  | 6.070000  | -1.745000 |
| 44 | H | 0.09 | 0.16 | 0.24 | 0.15 | 0.13 | 0.18 | H | 1.577000  | 6.610000  | -0.958000 |
| 45 | H | 0.09 | 0.16 | 0.24 | 0.15 | 0.13 | 0.18 | H | 0.001000  | 6.869000  | -0.154000 |

---

**Table S1-3.** Atomic charge (units of e) and atomic coordinates of **C3** ([Bzmim<sub>4</sub>]<sup>4+</sup>). The atoms in bold font are used in the RDF calculations: the most positively-charged atom (C); H-bonds (H); and the most negatively-charged atom (N).

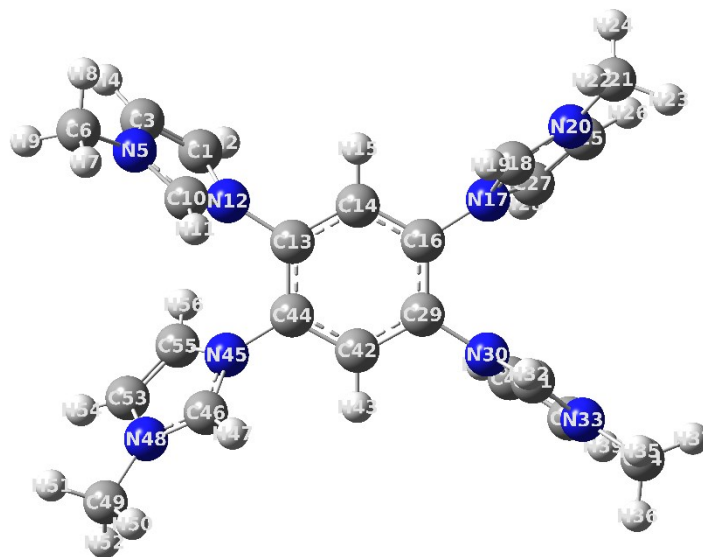

| No.       | Atom     | Hirshfeld | ChelpG | NBO   | CM5   | 0.8*ChelpG | 1.2*CM5      | Coordinates |           |          |           |
|-----------|----------|-----------|--------|-------|-------|------------|--------------|-------------|-----------|----------|-----------|
| 1         | C        | 0.03      | -0.13  | -0.01 | 0.05  | -0.11      | 0.06         | C           | -2.844000 | 2.256000 | -1.287000 |
| 2         | H        | 0.10      | 0.21   | 0.26  | 0.16  | 0.17       | 0.20         | H           | -2.363000 | 2.195000 | -2.249000 |
| 3         | C        | 0.06      | -0.07  | 0.03  | 0.08  | -0.06      | 0.10         | C           | -3.927000 | 2.969000 | -0.883000 |
| 4         | H        | 0.12      | 0.24   | 0.28  | 0.18  | 0.19       | 0.22         | H           | -4.566000 | 3.642000 | -1.436000 |
| <b>5</b>  | <b>N</b> | 0.06      | 0.12   | -0.32 | -0.20 | 0.10       | <b>-0.24</b> | N           | -4.127000 | 2.702000 | 0.461000  |
| 6         | C        | 0.03      | -0.21  | -0.35 | -0.07 | -0.17      | -0.08        | C           | -5.198000 | 3.304000 | 1.296000  |
| 7         | H        | 0.08      | 0.17   | 0.23  | 0.14  | 0.13       | 0.17         | H           | -5.113000 | 2.922000 | 2.312000  |
| 8         | H        | 0.09      | 0.18   | 0.25  | 0.15  | 0.15       | 0.18         | H           | -5.076000 | 4.387000 | 1.296000  |
| 9         | H        | 0.09      | 0.16   | 0.25  | 0.15  | 0.13       | 0.18         | H           | -6.166000 | 3.034000 | 0.876000  |
| <b>10</b> | <b>C</b> | 0.11      | -0.07  | 0.30  | 0.21  | -0.05      | <b>0.25</b>  | C           | -3.198000 | 1.848000 | 0.875000  |
| <b>11</b> | <b>H</b> | 0.11      | 0.19   | 0.25  | 0.18  | 0.15       | <b>0.21</b>  | H           | -3.087000 | 1.482000 | 1.884000  |
| 12        | N        | 0.02      | 0.10   | -0.40 | -0.22 | 0.08       | -0.27        | N           | -2.392000 | 1.542000 | -0.173000 |
| 13        | C        | 0.07      | 0.07   | 0.13  | 0.12  | 0.06       | 0.15         | C           | -1.200000 | 0.733000 | -0.133000 |
| 14        | C        | 0.00      | -0.13  | -0.04 | -0.04 | -0.10      | -0.05        | C           | 0.035000  | 1.385000 | -0.140000 |
| 15        | H        | 0.08      | 0.18   | 0.25  | 0.15  | 0.15       | 0.18         | H           | 0.057000  | 2.468000 | -0.166000 |
| 16        | C        | 0.07      | 0.08   | 0.12  | 0.13  | 0.06       | 0.15         | C           | 1.239000  | 0.674000 | -0.145000 |
| 17        | N        | 0.02      | 0.10   | -0.43 | -0.22 | 0.08       | -0.27        | N           | 2.474000  | 1.408000 | -0.210000 |
| 18        | C        | 0.11      | -0.04  | 0.40  | 0.21  | -0.03      | 0.25         | C           | 2.921000  | 2.294000 | 0.717000  |
| 19        | H        | 0.11      | 0.19   | 0.24  | 0.18  | 0.15       | 0.22         | H           | 2.460000  | 2.494000 | 1.671000  |
| 20        | N        | 0.06      | 0.11   | -0.35 | -0.20 | 0.09       | -0.24        | N           | 4.030000  | 2.863000 | 0.260000  |
| 21        | C        | 0.03      | -0.23  | -0.35 | -0.06 | -0.19      | -0.08        | C           | 4.840000  | 3.892000 | 0.963000  |
| 22        | H        | 0.08      | 0.18   | 0.23  | 0.15  | 0.14       | 0.17         | H           | 4.383000  | 4.105000 | 1.927000  |
| 23        | H        | 0.09      | 0.17   | 0.25  | 0.15  | 0.13       | 0.18         | H           | 5.850000  | 3.509000 | 1.106000  |
| 24        | H        | 0.09      | 0.19   | 0.25  | 0.15  | 0.15       | 0.18         | H           | 4.863000  | 4.795000 | 0.354000  |
| 25        | C        | 0.06      | -0.04  | 0.02  | 0.08  | -0.04      | 0.10         | C           | 4.315000  | 2.352000 | -0.995000 |
| 26        | H        | 0.12      | 0.23   | 0.28  | 0.18  | 0.18       | 0.22         | H           | 5.167000  | 2.684000 | -1.570000 |
| 27        | C        | 0.03      | -0.14  | -0.01 | 0.05  | -0.12      | 0.06         | C           | 3.350000  | 1.446000 | -1.299000 |
| 28        | H        | 0.09      | 0.20   | 0.25  | 0.16  | 0.16       | 0.19         | H           | 3.193000  | 0.866000 | -2.192000 |

|    |   |      |       |       |       |       |       |   |           |           |           |
|----|---|------|-------|-------|-------|-------|-------|---|-----------|-----------|-----------|
| 29 | C | 0.07 | 0.07  | 0.12  | 0.12  | 0.06  | 0.15  | C | 1.200000  | -0.733000 | -0.133000 |
| 30 | N | 0.02 | 0.11  | -0.46 | -0.22 | 0.08  | -0.27 | N | 2.392000  | -1.542000 | -0.173000 |
| 31 | C | 0.11 | -0.07 | 0.41  | 0.21  | -0.05 | 0.25  | C | 3.198000  | -1.848000 | 0.875000  |
| 32 | H | 0.11 | 0.19  | 0.24  | 0.18  | 0.15  | 0.21  | H | 3.087000  | -1.481000 | 1.883000  |
| 33 | N | 0.06 | 0.12  | -0.36 | -0.20 | 0.10  | -0.24 | N | 4.127000  | -2.702000 | 0.461000  |
| 34 | C | 0.03 | -0.21 | -0.35 | -0.07 | -0.17 | -0.08 | C | 5.199000  | -3.303000 | 1.296000  |
| 35 | H | 0.08 | 0.17  | 0.23  | 0.14  | 0.13  | 0.17  | H | 5.114000  | -2.920000 | 2.311000  |
| 36 | H | 0.09 | 0.18  | 0.25  | 0.15  | 0.15  | 0.18  | H | 5.076000  | -4.386000 | 1.297000  |
| 37 | H | 0.09 | 0.16  | 0.25  | 0.15  | 0.13  | 0.18  | H | 6.167000  | -3.035000 | 0.875000  |
| 38 | C | 0.06 | -0.07 | -0.02 | 0.08  | -0.06 | 0.10  | C | 3.927000  | -2.970000 | -0.883000 |
| 39 | H | 0.12 | 0.24  | 0.28  | 0.18  | 0.19  | 0.22  | H | 4.565000  | -3.642000 | -1.436000 |
| 40 | C | 0.03 | -0.13 | 0.09  | 0.05  | -0.11 | 0.06  | C | 2.844000  | -2.256000 | -1.286000 |
| 41 | H | 0.10 | 0.21  | 0.24  | 0.16  | 0.17  | 0.20  | H | 2.362000  | -2.196000 | -2.249000 |
| 42 | C | 0.00 | -0.13 | -0.04 | -0.04 | -0.10 | -0.05 | C | -0.035000 | -1.385000 | -0.140000 |
| 43 | H | 0.08 | 0.18  | 0.25  | 0.15  | 0.15  | 0.18  | H | -0.057000 | -2.468000 | -0.166000 |
| 44 | C | 0.07 | 0.08  | 0.13  | 0.13  | 0.06  | 0.15  | C | -1.239000 | -0.674000 | -0.145000 |
| 45 | N | 0.02 | 0.10  | -0.43 | -0.22 | 0.08  | -0.27 | N | -2.474000 | -1.408000 | -0.210000 |
| 46 | C | 0.11 | -0.03 | 0.40  | 0.21  | -0.03 | 0.25  | C | -2.921000 | -2.295000 | 0.717000  |
| 47 | H | 0.11 | 0.19  | 0.24  | 0.18  | 0.15  | 0.22  | H | -2.459000 | -2.495000 | 1.671000  |
| 48 | N | 0.06 | 0.11  | -0.35 | -0.20 | 0.09  | -0.24 | N | -4.030000 | -2.864000 | 0.260000  |
| 49 | C | 0.03 | -0.23 | -0.35 | -0.06 | -0.19 | -0.08 | C | -4.840000 | -3.893000 | 0.963000  |
| 50 | H | 0.08 | 0.18  | 0.23  | 0.15  | 0.14  | 0.17  | H | -4.382000 | -4.107000 | 1.927000  |
| 51 | H | 0.09 | 0.17  | 0.25  | 0.15  | 0.13  | 0.18  | H | -5.849000 | -3.510000 | 1.107000  |
| 52 | H | 0.09 | 0.19  | 0.25  | 0.15  | 0.15  | 0.18  | H | -4.862000 | -4.796000 | 0.354000  |
| 53 | C | 0.06 | -0.04 | 0.02  | 0.08  | -0.04 | 0.10  | C | -4.316000 | -2.351000 | -0.995000 |
| 54 | H | 0.12 | 0.23  | 0.28  | 0.18  | 0.18  | 0.22  | H | -5.168000 | -2.683000 | -1.569000 |
| 55 | C | 0.03 | -0.14 | -0.01 | 0.05  | -0.11 | 0.06  | C | -3.351000 | -1.446000 | -1.298000 |
| 56 | H | 0.09 | 0.20  | 0.25  | 0.16  | 0.16  | 0.19  | H | -3.195000 | -0.864000 | -2.191000 |

**Table S1-4.** Atomic charge (units of e) and atomic coordinates of **A1** ([NpO<sub>2</sub>]<sup>2-</sup>). The atom in bold font is used in the RDF calculations: the most negatively-charged atom (O).

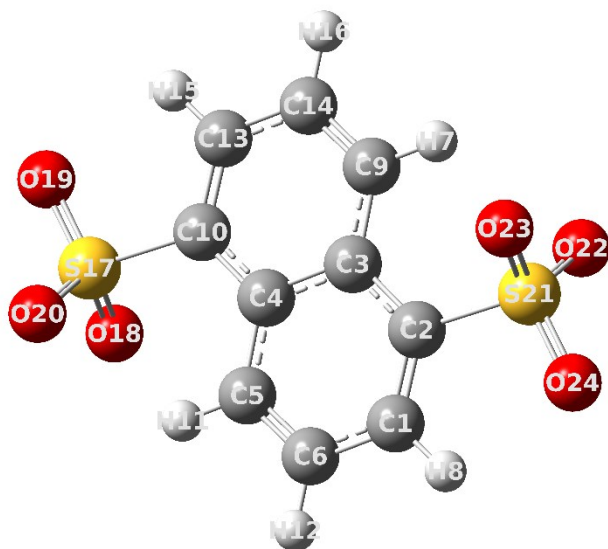

| No.       | Atom     | Hirshfeld    | ChelpG       | NBO          | CM5          | 0.8*ChelpG   | 1.2*CM5      | Coordinates |                  |                  |                  |
|-----------|----------|--------------|--------------|--------------|--------------|--------------|--------------|-------------|------------------|------------------|------------------|
| 1         | C        | -0.06        | -0.04        | -0.25        | -0.11        | -0.04        | -0.13        | C           | 1.673000         | -1.905000        | 0.000000         |
| 2         | C        | -0.03        | -0.18        | -0.24        | -0.02        | -0.15        | -0.02        | C           | 1.811000         | -0.538000        | 0.000000         |
| 3         | C        | 0.00         | 0.17         | -0.11        | 0.00         | 0.13         | 0.00         | C           | 0.653000         | 0.305000         | 0.000000         |
| 4         | C        | 0.00         | 0.17         | 0.07         | 0.00         | 0.13         | 0.00         | C           | -0.653000        | -0.305000        | 0.000000         |
| 5         | C        | -0.04        | -0.19        | -0.23        | -0.10        | -0.15        | -0.11        | C           | -0.746000        | -1.724000        | 0.000000         |
| 6         | C        | -0.06        | -0.14        | -0.15        | -0.12        | -0.12        | -0.14        | C           | 0.390000         | -2.496000        | 0.000000         |
| 7         | H        | 0.03         | 0.16         | 0.23         | 0.09         | 0.13         | 0.11         | H           | 1.726000         | 2.179000         | 0.000000         |
| 8         | H        | 0.02         | 0.08         | 0.23         | 0.08         | 0.07         | 0.10         | H           | 2.570000         | -2.511000        | 0.000000         |
| 9         | C        | -0.04        | -0.19        | -0.21        | -0.10        | -0.15        | -0.11        | C           | 0.746000         | 1.724000         | 0.000000         |
| 10        | C        | -0.03        | -0.18        | -0.28        | -0.02        | -0.15        | -0.02        | C           | -1.811000        | 0.538000         | 0.000000         |
| 11        | H        | 0.03         | 0.16         | 0.23         | 0.09         | 0.13         | 0.11         | H           | -1.726000        | -2.179000        | 0.000000         |
| 12        | H        | 0.02         | 0.05         | 0.17         | 0.07         | 0.04         | 0.09         | H           | 0.303000         | -3.579000        | 0.000000         |
| 13        | C        | -0.06        | -0.04        | -0.24        | -0.11        | -0.04        | -0.13        | C           | -1.673000        | 1.905000         | 0.000000         |
| 14        | C        | -0.06        | -0.14        | -0.14        | -0.12        | -0.12        | -0.14        | C           | -0.390000        | 2.496000         | 0.000000         |
| 15        | H        | 0.02         | 0.08         | 0.22         | 0.08         | 0.07         | 0.10         | H           | -2.570000        | 2.511000         | 0.000000         |
| 16        | H        | 0.02         | 0.05         | 0.17         | 0.07         | 0.04         | 0.09         | H           | -0.303000        | 3.579000         | 0.000000         |
| 17        | S        | 0.38         | 1.19         | 2.35         | 0.48         | 0.95         | 0.57         | S           | -3.525000        | -0.140000        | 0.000000         |
| <b>18</b> | <b>O</b> | <b>-0.42</b> | <b>-0.70</b> | <b>-1.02</b> | <b>-0.46</b> | <b>-0.56</b> | <b>-0.55</b> | <b>O</b>    | <b>-3.625000</b> | <b>-0.952000</b> | <b>-1.244000</b> |
| 19        | O        | -0.42        | -0.69        | -1.03        | -0.46        | -0.55        | -0.55        | O           | -4.404000        | 1.062000         | 0.000000         |
| 20        | O        | -0.42        | -0.70        | -1.02        | -0.46        | -0.56        | -0.55        | O           | -3.625000        | -0.952000        | 1.244000         |
| 21        | S        | 0.38         | 1.19         | 2.35         | 0.48         | 0.95         | 0.57         | S           | 3.525000         | 0.140000         | 0.000000         |
| 22        | O        | -0.42        | -0.70        | -1.02        | -0.46        | -0.56        | -0.55        | O           | 3.625000         | 0.952000         | -1.244000        |
| 23        | O        | -0.42        | -0.70        | -1.02        | -0.46        | -0.56        | -0.55        | O           | 3.625000         | 0.952000         | 1.244000         |
| 24        | O        | -0.42        | -0.69        | -1.03        | -0.46        | -0.55        | -0.55        | O           | 4.404000         | -1.062000        | 0.000000         |

**Table S1-5.** Atomic charge (units of e) and atomic coordinates of **A2** ( $[\text{Np}(\text{TfNO})_2]^{2-}$ ). The atom in bold font is used in the RDF calculations: the most negatively-charged atom (N) and the second most negatively-charged atom (O).

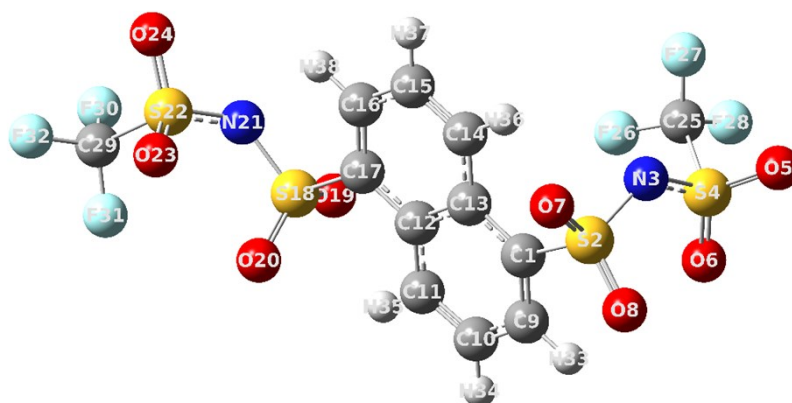

| No.      | Atom     | Hirshfeld | ChelpG | NBO   | CM5   | 0.8*ChelpG | 1.2*CM5      | Coordinates                     |
|----------|----------|-----------|--------|-------|-------|------------|--------------|---------------------------------|
| 1        | C        | -0.03     | -0.20  | -0.31 | -0.02 | -0.16      | -0.02        | C 2.209000 -1.467000 -0.071000  |
| 2        | S        | 0.44      | 0.99   | 2.30  | 0.56  | 0.79       | 0.68         | S 3.732000 -1.678000 0.916000   |
| <b>3</b> | <b>N</b> | -0.29     | -0.59  | -1.24 | -0.45 | -0.47      | <b>-0.54</b> | N 4.470000 -0.217000 1.002000   |
| 4        | S        | 0.40      | 1.02   | 2.20  | 0.54  | 0.81       | 0.65         | S 5.271000 0.472000 -0.196000   |
| <b>5</b> | <b>O</b> | -0.36     | -0.58  | -0.95 | -0.40 | -0.46      | <b>-0.48</b> | O 6.614000 0.891000 0.218000    |
| 6        | O        | -0.34     | -0.54  | -0.95 | -0.38 | -0.44      | -0.46        | O 5.114000 -0.107000 -1.537000  |
| 7        | O        | -0.35     | -0.58  | -0.97 | -0.39 | -0.46      | -0.47        | O 3.319000 -1.985000 2.292000   |
| 8        | O        | -0.35     | -0.54  | -0.97 | -0.39 | -0.43      | -0.47        | O 4.540000 -2.686000 0.213000   |
| 9        | C        | -0.04     | -0.01  | -0.18 | -0.09 | -0.01      | -0.10        | C 2.210000 -2.061000 -1.309000  |
| 10       | C        | -0.05     | -0.11  | -0.22 | -0.10 | -0.09      | -0.12        | C 1.064000 -1.987000 -2.126000  |
| 11       | C        | -0.03     | -0.13  | -0.20 | -0.08 | -0.11      | -0.10        | C -0.066000 -1.339000 -1.697000 |
| 12       | C        | 0.01      | 0.11   | 0.05  | 0.00  | 0.08       | 0.01         | C -0.104000 -0.703000 -0.426000 |
| 13       | C        | 0.01      | 0.19   | 0.05  | 0.00  | 0.15       | 0.00         | C 1.067000 -0.751000 0.412000   |
| 14       | C        | -0.03     | -0.16  | -0.21 | -0.09 | -0.13      | -0.10        | C 1.042000 -0.081000 1.665000   |
| 15       | C        | -0.04     | -0.12  | -0.22 | -0.10 | -0.10      | -0.12        | C -0.079000 0.596000 2.074000   |
| 16       | C        | -0.04     | -0.02  | -0.14 | -0.09 | -0.02      | -0.11        | C -1.239000 0.636000 1.272000   |
| 17       | C        | -0.02     | -0.14  | -0.30 | -0.01 | -0.11      | -0.01        | C -1.257000 -0.005000 0.060000  |
| 18       | S        | 0.44      | 1.08   | 2.27  | 0.57  | 0.86       | 0.68         | S -2.768000 0.088000 -0.968000  |
| 19       | O        | -0.36     | -0.58  | -0.96 | -0.40 | -0.46      | -0.48        | O -2.440000 0.953000 -2.110000  |
| 20       | O        | -0.34     | -0.57  | -0.96 | -0.39 | -0.46      | -0.47        | O -3.179000 -1.290000 -1.279000 |
| 21       | N        | -0.28     | -0.67  | -1.24 | -0.44 | -0.54      | -0.53        | N -3.842000 0.926000 -0.050000  |
| 22       | S        | 0.40      | 0.99   | 2.20  | 0.54  | 0.79       | 0.65         | S -4.951000 0.309000 0.912000   |
| 23       | O        | -0.34     | -0.56  | -0.94 | -0.38 | -0.45      | -0.46        | O -4.763000 -1.060000 1.399000  |
| 24       | O        | -0.36     | -0.57  | -0.96 | -0.40 | -0.45      | -0.48        | O -5.352000 1.333000 1.883000   |
| 25       | C        | 0.24      | 0.40   | 0.86  | 0.31  | 0.32       | 0.37         | C 4.347000 2.122000 -0.309000   |
| 26       | F        | -0.10     | -0.19  | -0.35 | -0.12 | -0.15      | -0.14        | F 3.060000 1.945000 -0.633000   |
| 27       | F        | -0.12     | -0.19  | -0.36 | -0.14 | -0.15      | -0.16        | F 4.399000 2.808000 0.845000    |
| 28       | F        | -0.13     | -0.20  | -0.37 | -0.14 | -0.16      | -0.17        | F 4.909000 2.895000 -1.264000   |
| 29       | C        | 0.24      | 0.57   | 0.85  | 0.31  | 0.45       | 0.37         | C -6.491000 0.184000 -0.192000  |
| 30       | F        | -0.12     | -0.23  | -0.36 | -0.14 | -0.19      | -0.17        | F -6.846000 1.384000 -0.687000  |
| 31       | F        | -0.11     | -0.19  | -0.36 | -0.13 | -0.16      | -0.15        | F -6.309000 -0.649000 -1.224000 |
| 32       | F        | -0.13     | -0.26  | -0.37 | -0.15 | -0.20      | -0.17        | F -7.539000 -0.279000 0.527000  |



|    |   |      |      |      |      |      |      |   |           |           |           |
|----|---|------|------|------|------|------|------|---|-----------|-----------|-----------|
| 33 | H | 0.04 | 0.11 | 0.24 | 0.10 | 0.08 | 0.12 | H | 3.099000  | -2.580000 | -1.639000 |
| 34 | H | 0.03 | 0.07 | 0.20 | 0.09 | 0.05 | 0.10 | H | 1.078000  | -2.458000 | -3.103000 |
| 35 | H | 0.03 | 0.12 | 0.23 | 0.10 | 0.10 | 0.12 | H | -0.942000 | -1.309000 | -2.328000 |
| 36 | H | 0.03 | 0.14 | 0.23 | 0.10 | 0.11 | 0.12 | H | 1.917000  | -0.119000 | 2.297000  |
| 37 | H | 0.03 | 0.08 | 0.20 | 0.09 | 0.06 | 0.11 | H | -0.080000 | 1.108000  | 3.030000  |
| 38 | H | 0.03 | 0.11 | 0.22 | 0.10 | 0.09 | 0.12 | H | -2.116000 | 1.175000  | 1.604000  |

---

**Table S1-6.** Atomic charge (units of e) and atomic coordinates of **A3** ( $[\text{BzO}_3]^{3-}$ ). The atom in bold font is used in the RDF calculations: the most negatively-charged atom (O).

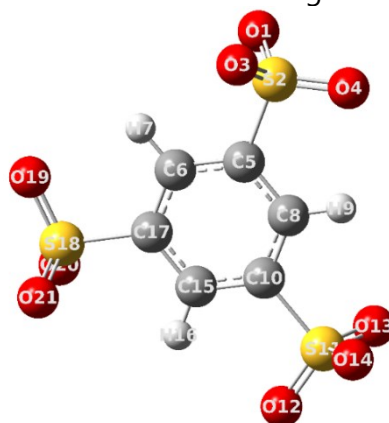

| No.      | Atom     | Hirshfeld | ChelpG | NBO   | CM5   | 0.8*ChelpG | 1.2*CM5      | Coordinates |           |           |           |
|----------|----------|-----------|--------|-------|-------|------------|--------------|-------------|-----------|-----------|-----------|
| <b>1</b> | <b>O</b> | -0.45     | -0.71  | -1.04 | -0.49 | -0.57      | <b>-0.59</b> | O           | 1.862000  | 3.200000  | -1.244000 |
| 2        | S        | 0.37      | 1.13   | 2.34  | 0.47  | 0.91       | 0.56         | S           | 2.140000  | 2.422000  | 0.000000  |
| 3        | O        | -0.45     | -0.71  | -1.04 | -0.49 | -0.57      | -0.59        | O           | 1.861000  | 3.201000  | 1.243000  |
| 4        | O        | -0.43     | -0.70  | -1.04 | -0.48 | -0.56      | -0.57        | O           | 3.485000  | 1.776000  | 0.001000  |
| 5        | C        | -0.03     | -0.06  | -0.26 | -0.02 | -0.05      | -0.03        | C           | 0.928000  | 1.039000  | 0.000000  |
| 6        | C        | -0.04     | -0.08  | -0.21 | -0.09 | -0.07      | -0.11        | C           | -0.444000 | 1.328000  | -0.001000 |
| 7        | H        | 0.03      | 0.13   | 0.24  | 0.09  | 0.10       | 0.11         | H           | -0.797000 | 2.351000  | -0.001000 |
| 8        | C        | -0.04     | -0.06  | -0.21 | -0.09 | -0.05      | -0.11        | C           | 1.372000  | -0.280000 | 0.000000  |
| 9        | H        | 0.03      | 0.12   | 0.24  | 0.09  | 0.09       | 0.11         | H           | 2.434000  | -0.485000 | 0.001000  |
| 10       | C        | -0.03     | -0.07  | -0.26 | -0.02 | -0.05      | -0.03        | C           | 0.436000  | -1.324000 | 0.000000  |
| 11       | S        | 0.37      | 1.16   | 2.34  | 0.47  | 0.93       | 0.56         | S           | 1.028000  | -3.064000 | 0.000000  |
| 12       | O        | -0.43     | -0.71  | -1.04 | -0.48 | -0.57      | -0.57        | O           | -0.204000 | -3.906000 | 0.001000  |
| 13       | O        | -0.45     | -0.72  | -1.04 | -0.49 | -0.58      | -0.59        | O           | 1.840000  | -3.213000 | -1.244000 |
| 14       | O        | -0.45     | -0.72  | -1.04 | -0.49 | -0.57      | -0.59        | O           | 1.842000  | -3.212000 | 1.243000  |
| 15       | C        | -0.04     | -0.07  | -0.21 | -0.09 | -0.06      | -0.11        | C           | -0.928000 | -1.048000 | -0.001000 |
| 16       | H        | 0.03      | 0.12   | 0.24  | 0.09  | 0.10       | 0.11         | H           | -1.637000 | -1.865000 | -0.001000 |
| 17       | C        | -0.03     | -0.06  | -0.26 | -0.02 | -0.04      | -0.03        | C           | -1.364000 | 0.285000  | -0.001000 |
| 18       | S        | 0.37      | 1.15   | 2.34  | 0.47  | 0.92       | 0.56         | S           | -3.168000 | 0.642000  | 0.000000  |
| 19       | O        | -0.43     | -0.71  | -1.04 | -0.48 | -0.57      | -0.57        | O           | -3.281000 | 2.130000  | -0.009000 |
| 20       | O        | -0.45     | -0.71  | -1.04 | -0.49 | -0.57      | -0.59        | O           | -3.705000 | 0.004000  | -1.239000 |
| 21       | O        | -0.45     | -0.72  | -1.04 | -0.49 | -0.57      | -0.59        | O           | -3.701000 | 0.020000  | 1.248000  |

**Table S2.** The radial locations (units of nm) of the RDF peak positions of the site-site RDFs between the anions with the cations and CO<sub>2</sub>.

|      | O (anion) –<br>N (cation) |       | O (anion) –<br>H (cation) | O (anion) –<br>C (CO <sub>2</sub> ) | N (anion) –<br>C (CO <sub>2</sub> ) |
|------|---------------------------|-------|---------------------------|-------------------------------------|-------------------------------------|
|      | 1st                       | 2nd   |                           |                                     |                                     |
| A1C1 | 0.316                     | 0.534 | 0.248                     | 0.284                               | 0.420                               |
| A1C2 | 0.320                     | 0.518 | 0.240                     | 0.284                               | 0.518                               |
| A1C3 | 0.302                     | 0.526 | 0.242                     | 0.288                               | 0.528                               |
| A2C1 | 0.344                     | 0.538 | 0.258                     | 0.316                               | 0.330                               |
| A2C2 | 0.330                     | 0.546 | 0.242                     | 0.290                               | 0.478                               |
| A2C3 | 0.326                     | 0.512 | 0.242                     | 0.290                               | 0.482                               |
| A3C1 | 0.312                     | 0.528 | 0.252                     | 0.280                               | 0.492                               |
| A3C2 | 0.308                     | 0.506 | 0.240                     | 0.280                               | 0.488                               |
| A3C3 | 0.314                     | 0.504 | 0.240                     | 0.290                               | 0.494                               |

**Table S3.** Density distribution statistics of the anion and cation species in the neat ionic liquids.

|      | Anion                     |                                 |                                               | Cation                    |                                 |                                               |
|------|---------------------------|---------------------------------|-----------------------------------------------|---------------------------|---------------------------------|-----------------------------------------------|
|      | Mean<br>g/cm <sup>3</sup> | Difference<br>g/cm <sup>3</sup> | Variance<br>(g/cm <sup>3</sup> ) <sup>2</sup> | Mean<br>g/cm <sup>3</sup> | Difference<br>g/cm <sup>3</sup> | Variance<br>(g/cm <sup>3</sup> ) <sup>2</sup> |
| A1C1 | 0.780                     | 0.109                           | 0.020                                         | 0.670                     | 0.103                           | 0.016                                         |
| A1C2 | 0.785                     | 0.109                           | 0.019                                         | 0.590                     | 0.095                           | 0.014                                         |
| A1C3 | 0.820                     | 0.110                           | 0.022                                         | 0.580                     | 0.100                           | 0.018                                         |
| A2C1 | 1.120                     | 0.161                           | 0.041                                         | 0.500                     | 0.127                           | 0.025                                         |
| A2C2 | 1.080                     | 0.159                           | 0.048                                         | 0.420                     | 0.104                           | 0.017                                         |
| A2C3 | 1.120                     | 0.147                           | 0.035                                         | 0.410                     | 0.107                           | 0.018                                         |
| A3C1 | 0.700                     | 0.105                           | 0.017                                         | 0.800                     | 0.093                           | 0.014                                         |
| A3C2 | 0.700                     | 0.105                           | 0.018                                         | 0.710                     | 0.095                           | 0.015                                         |
| A3C3 | 0.730                     | 0.111                           | 0.021                                         | 0.700                     | 0.104                           | 0.019                                         |

$$Mean = (1/n) \sum_{i=1}^n \rho_i(x,y,z) \quad (1)$$

$$Difference = (1/n) \sum_{i=1}^n |\rho_i(x,y,z) - Mean| \quad (2)$$

$$Variance = (1/n) \sum_{i=1}^n |\rho_i(x,y,z) - Mean|^2 \quad (3)$$

**Table S4.** Average ESP values ( $\bar{V}$ , units of V) with probe sizes ranging from 0 to 2.0 Å in neat ILs.

| Probe size | 0.0 Å  | 0.5 Å  | 1.0 Å  | 1.5 Å  | 2.0 Å  | trend    |
|------------|--------|--------|--------|--------|--------|----------|
| A1C1       | -0.180 | -0.150 | -0.080 | 0.140  | 0.350  | increase |
| A1C2       | -0.050 | -0.090 | -0.110 | -0.130 | -0.150 | decrease |
| A1C3       | -0.050 | -0.090 | -0.110 | -0.130 | -0.160 | decrease |
| A2C1       | -0.075 | 0.010  | 0.220  | 0.440  | 0.580  | increase |
| A2C2       | 0.060  | 0.110  | 0.120  | 0.150  | 0.180  | increase |
| A2C3       | 0.080  | 0.130  | 0.200  | 0.275  | 0.340  | increase |
| A3C1       | -0.140 | -0.080 | 0.185  | 0.595  | 1.165  | increase |
| A3C2       | 0.070  | -0.010 | -0.090 | -0.210 | -0.380 | decrease |
| A3C3       | 0.050  | -0.025 | -0.090 | -0.170 | -0.230 | decrease |

**Table S5.** Electrostatic potential descriptors of CO<sub>2</sub> in gas phase.

|                 | $\bar{V}_S$ | $\bar{V}_S^+$ | $\bar{V}_S^-$ | $\sigma_{tot}^2$        | $\sigma_+^2$ | $\sigma_-^2$ | $\nu$ | $\nu \cdot \sigma_{tot}^2$ | $\Pi$    |
|-----------------|-------------|---------------|---------------|-------------------------|--------------|--------------|-------|----------------------------|----------|
|                 | kcal/mol    |               |               | (kcal/mol) <sup>2</sup> |              |              | NA    | (kcal/mol) <sup>2</sup>    | kcal/mol |
| CO <sub>2</sub> | 3.614       | 15.178        | -8.157        | 99.645                  | 84.870       | 14.775       | 0.126 | 12.584                     | 11.942   |

**Table S6.** Interaction energy (units of kcal/mol) between the anions and cations in the neat ionic liquids.\*

|      | $E_{vdW}$ | $E_{elec}$ | $E_{tot}$ |
|------|-----------|------------|-----------|
| A1C1 | -82       | -228       | -310      |
| A1C2 | -62       | -957       | -1019     |
| A1C3 | -37       | -368       | -405      |
| A2C1 | -101      | -208       | -309      |
| A2C2 | -81       | -861       | -942      |
| A2C3 | -48       | -331       | -379      |
| A3C1 | -203      | -1019      | -1222     |
| A3C2 | -21       | -211       | -232      |
| A3C3 | -86       | -1644      | -1730     |

\*Estimated interaction for one ion pair of the neat IL (dielectric constant of solute = 11.5 is used in g\_mmpbsa<sup>8</sup> calculations). The dielectric constant is taken from the generic ionic liquid (GIL)<sup>9</sup> in Solvation Model Based on Density (SMD)<sup>10</sup> using DFT calculations. The calculated electrostatic interaction in the neat IL was manually divided by the total charges in the system, e.g.,  $1.2*2+1.2*2$  for A1C1 (1.2 is the CM5 charge scaling factor), in order to properly account for the ionic nature of the IL solutes. The statistical difference is calculated as STDEV/Mean% for  $E_{vdW}$ ,  $E_{elec}$ , and  $E_{tot}$ , corresponding to values below 1%, 0.2%, and 0.2%, respectively.

**Table S7.** Average potential energy contributions (units of kcal/mol) per CO<sub>2</sub> molecule, with n CO<sub>2</sub> molecules absorbed within the different IL solvents after MD/GCMC simulations.

|       | n CO <sub>2</sub><br>mol | Cation...CO <sub>2</sub> |            |           | Anion...CO <sub>2</sub> |            |           | IL...CO <sub>2</sub> |            |           |
|-------|--------------------------|--------------------------|------------|-----------|-------------------------|------------|-----------|----------------------|------------|-----------|
|       |                          | $E_{vdW}$                | $E_{elec}$ | $E_{tot}$ | $E_{vdW}$               | $E_{elec}$ | $E_{tot}$ | $E_{vdW}$            | $E_{elec}$ | $E_{tot}$ |
| A1C1  | 7                        | -6.22                    | -0.68      | -6.90     | -2.04                   | -2.07      | -4.11     | -8.26                | -2.75      | -11.01    |
| A1C2  | 135                      | -2.56                    | -0.53      | -3.09     | -3.03                   | -3.18      | -6.22     | -5.59                | -3.72      | -9.31     |
| A1C3  | 105                      | -2.13                    | -0.41      | -2.54     | -3.09                   | -3.87      | -6.95     | -5.22                | -4.27      | -9.49     |
| A2C1  | 25                       | -6.83                    | -0.20      | -7.04     | -2.55                   | -2.08      | -4.63     | -9.38                | -2.29      | -11.67    |
| A2C2  | 136                      | -1.95                    | -1.00      | -2.95     | -3.99                   | -2.56      | -6.55     | -5.94                | -3.56      | -9.50     |
| A2C3  | 66                       | -1.67                    | -1.14      | -2.81     | -4.08                   | -2.57      | -6.65     | -5.76                | -3.71      | -9.46     |
| A3C1  | 33                       | -7.04                    | 0.24       | -6.80     | -1.40                   | -4.88      | -6.28     | -8.44                | -4.64      | -13.09    |
| A3C2  | 42                       | -3.41                    | -0.38      | -3.79     | -2.46                   | -4.53      | -6.99     | -5.86                | -4.92      | -10.78    |
| A3C3  | 197                      | -2.88                    | -0.27      | -3.15     | -2.47                   | -4.44      | -6.91     | -5.35                | -4.71      | -10.06    |
| STDEV | NA                       | 0.17                     | 0.81       | 0.84      | 0.13                    | 0.84       | 0.86      | 0.22                 | 0.27       | 0.37      |



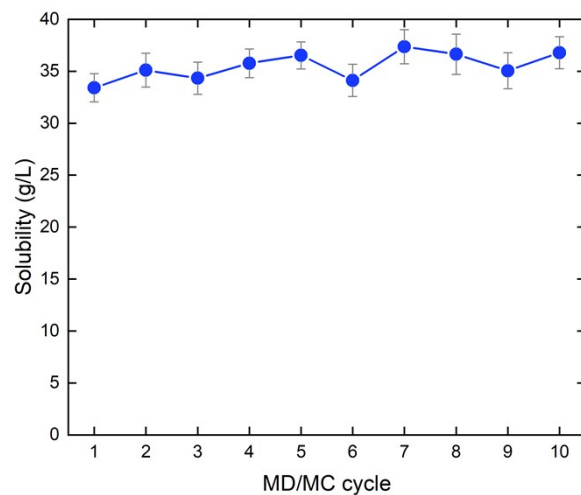

**Figure S1.** CO<sub>2</sub> solubility in the A1C3 mixture as a function of the number of alternating MD/MC cycles.

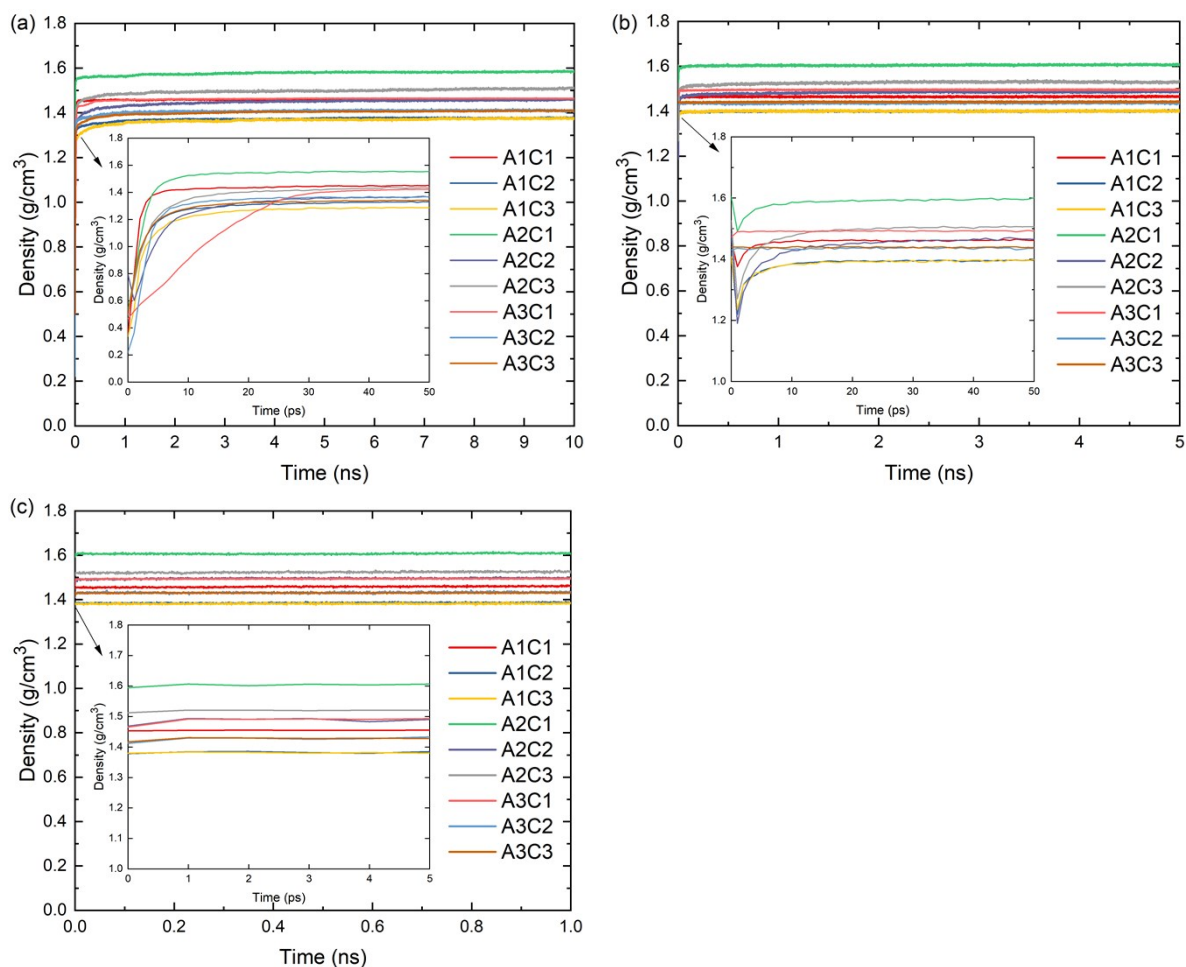

**Figure S2.** Density evolution of our IL systems during the equilibration stage. The graph inserts show the density values within the first several picoseconds. (a) 10 ns of MD simulation within the NPT ensemble before the production stage for the neat ILs; (b) 5 ns of MD simulation within the NPT ensemble before the production stage of  $n$  CO<sub>2</sub> molecules within ILs after GCMC simulations; (c) 1 ns of MD simulation within the NPT ensemble before the production stage for one CO<sub>2</sub> molecule within ILs.

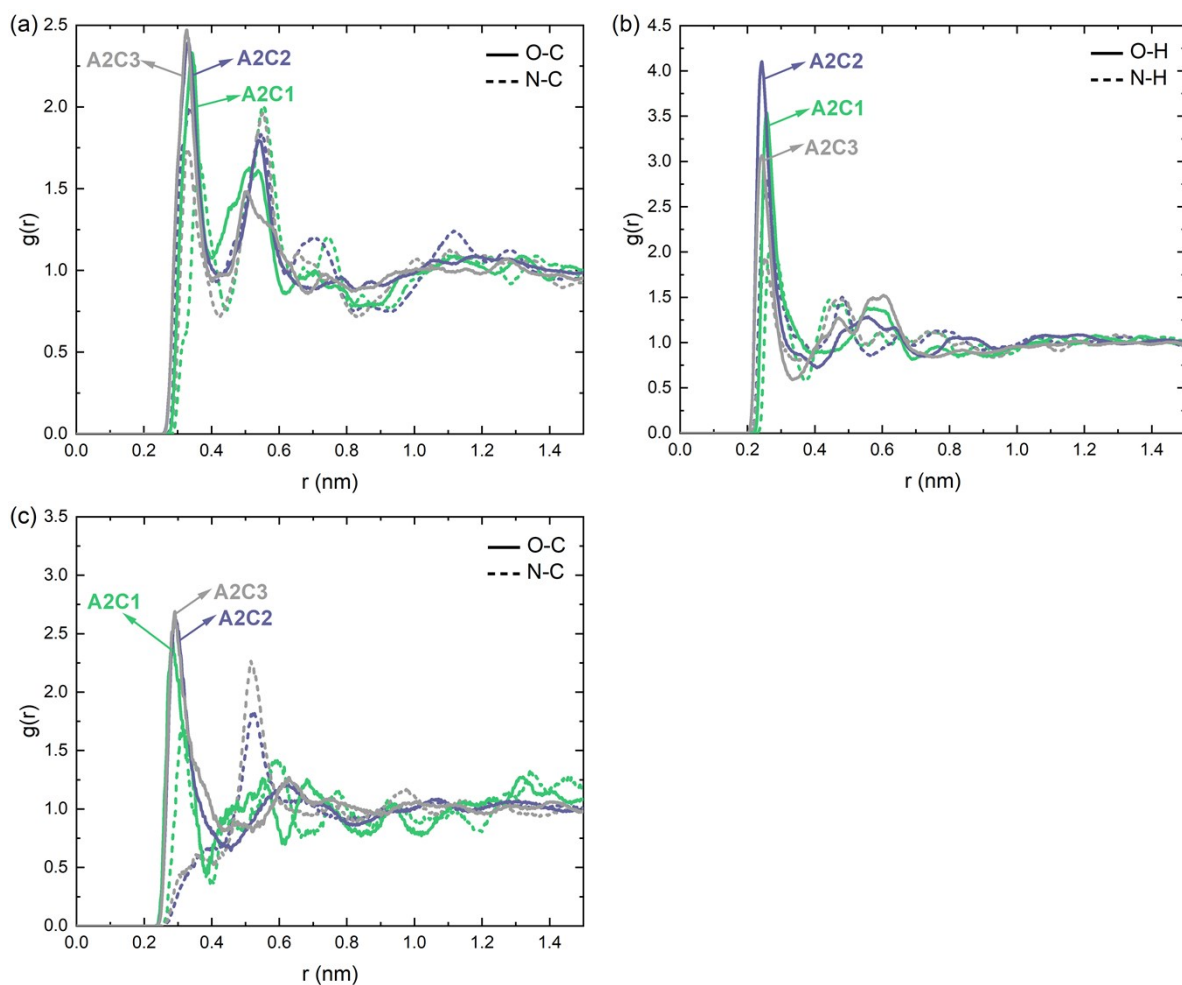

**Figure S3.** RDFs for comparison between O atoms and the most negatively charged N atoms with other atoms in cations. (a) with the most positively-charged cation atom; (b) with the H atom of the cation located between the two N atoms in the imidazolium rings; and (c) with the carbon atom in  $\text{CO}_2$ .

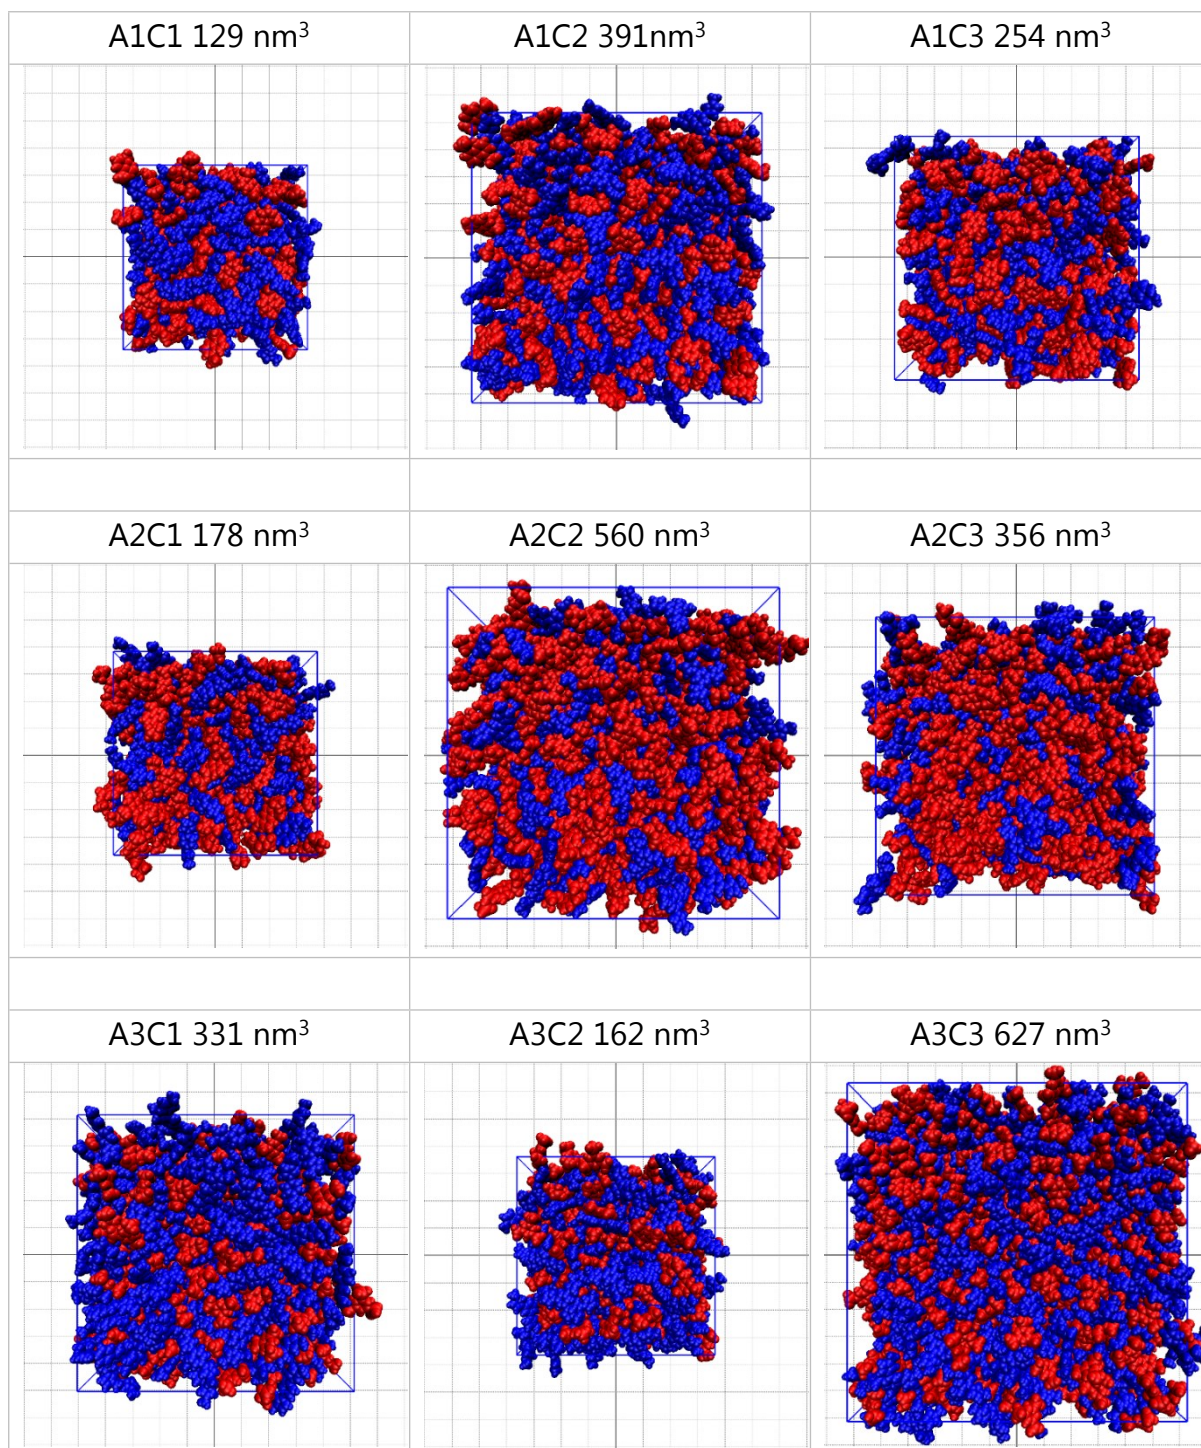

**Figure S4.** Representative structural snapshots and simulation box sizes for the neat IL compositions: cation (blue) and anion (red). The length of one grid is equal to 1 nm.



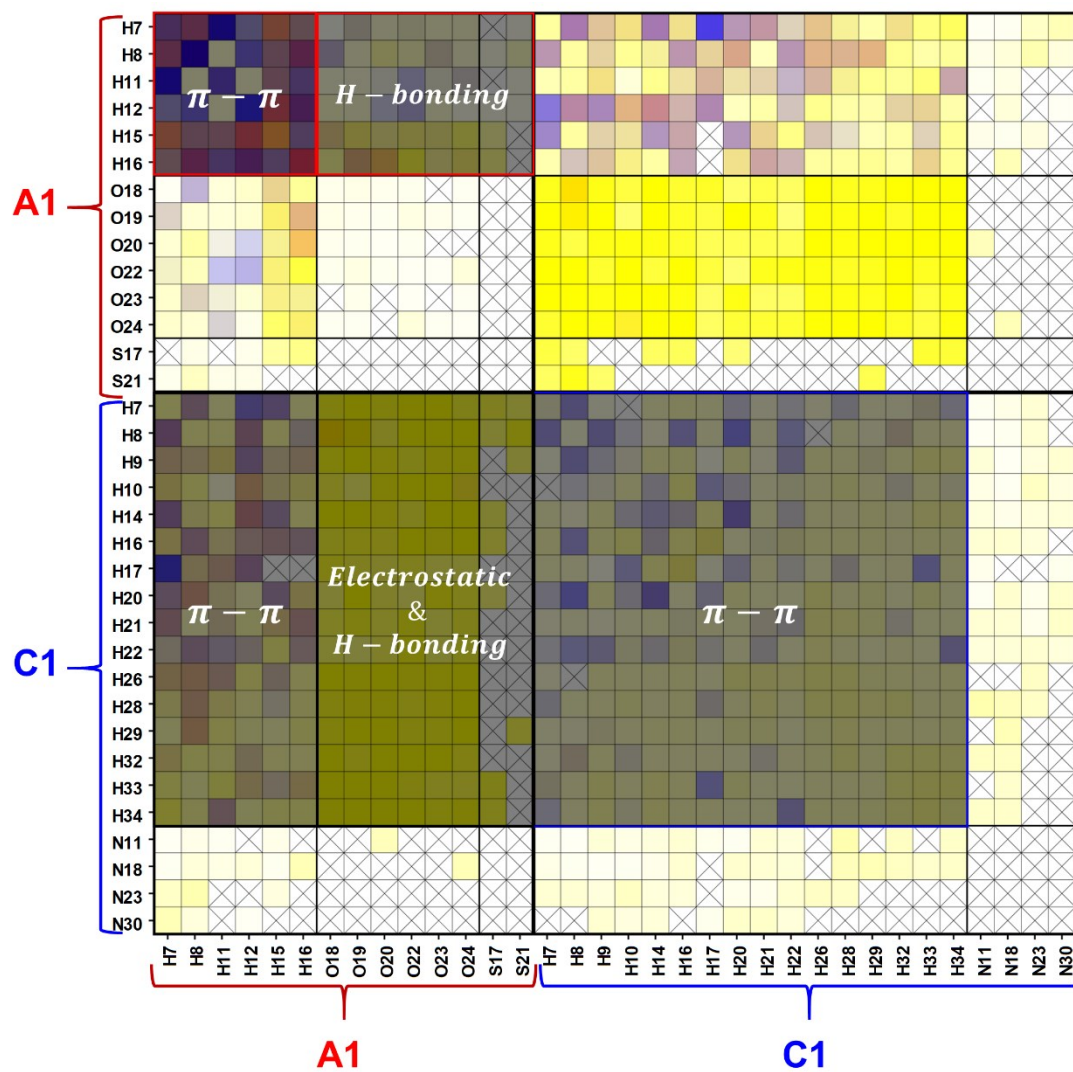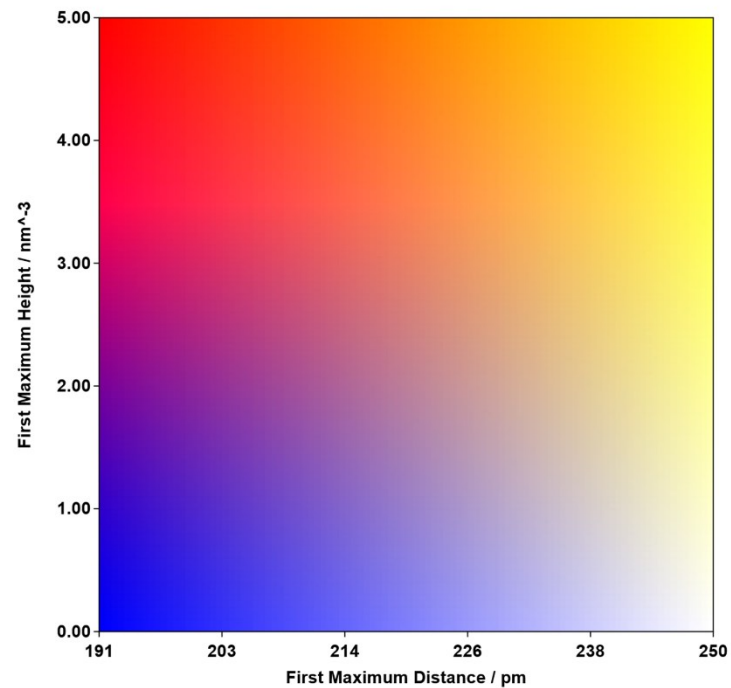

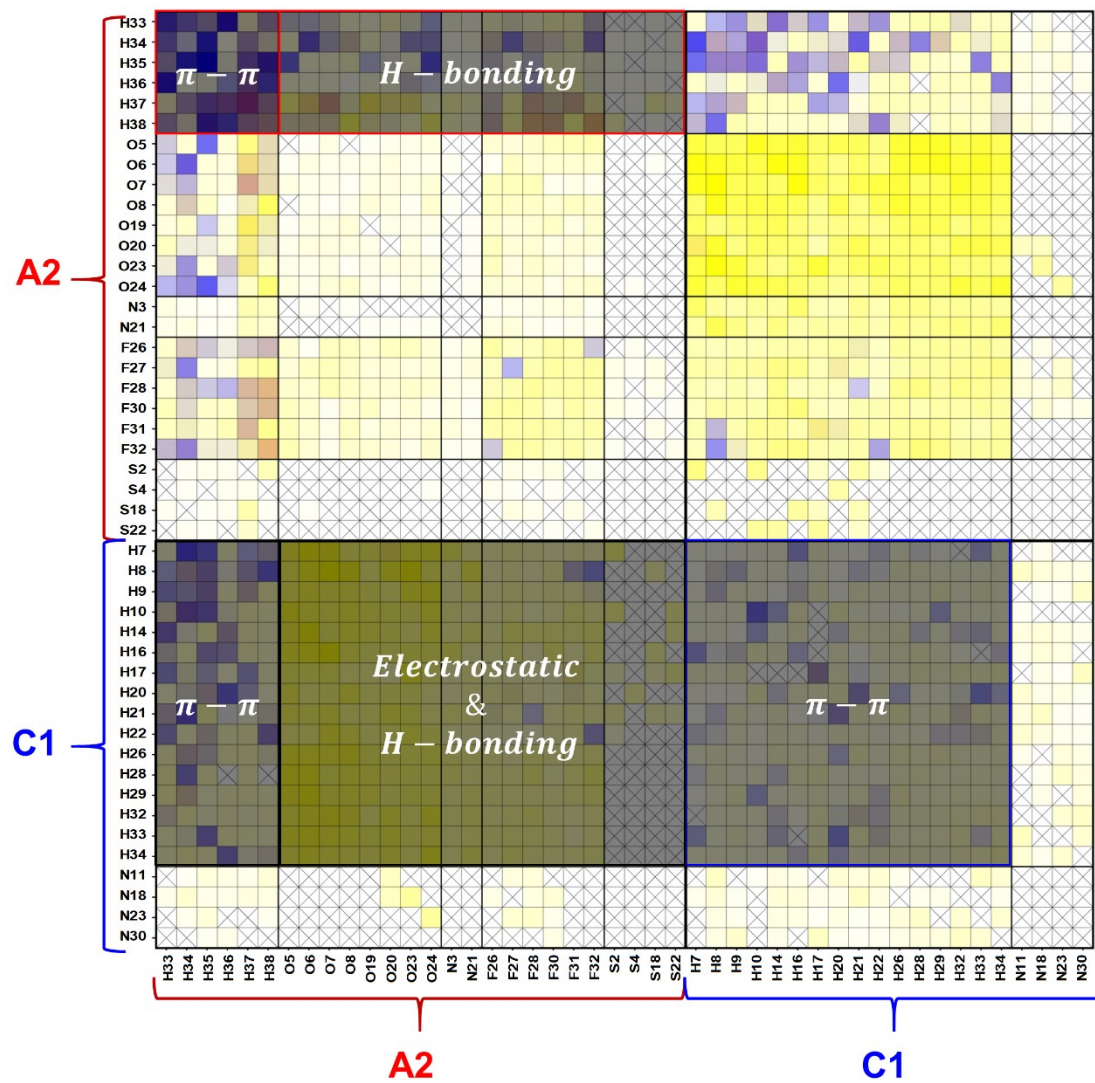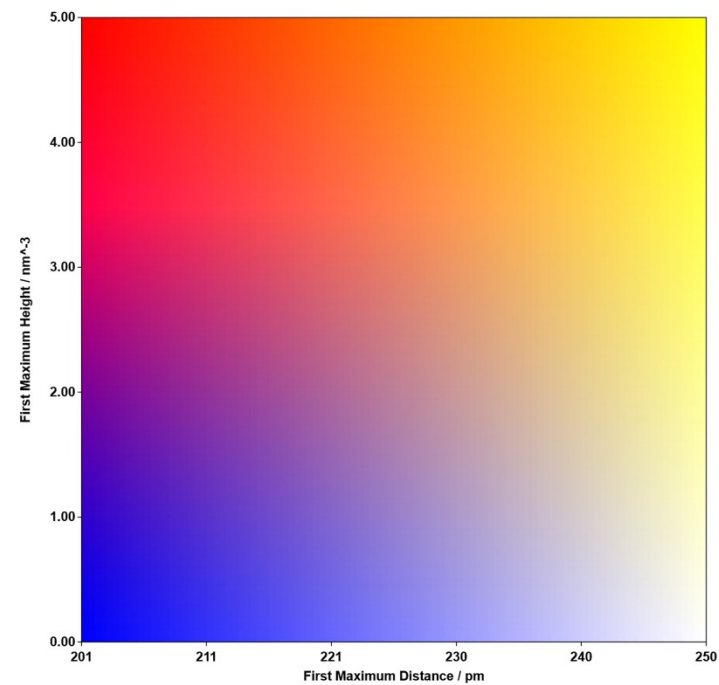

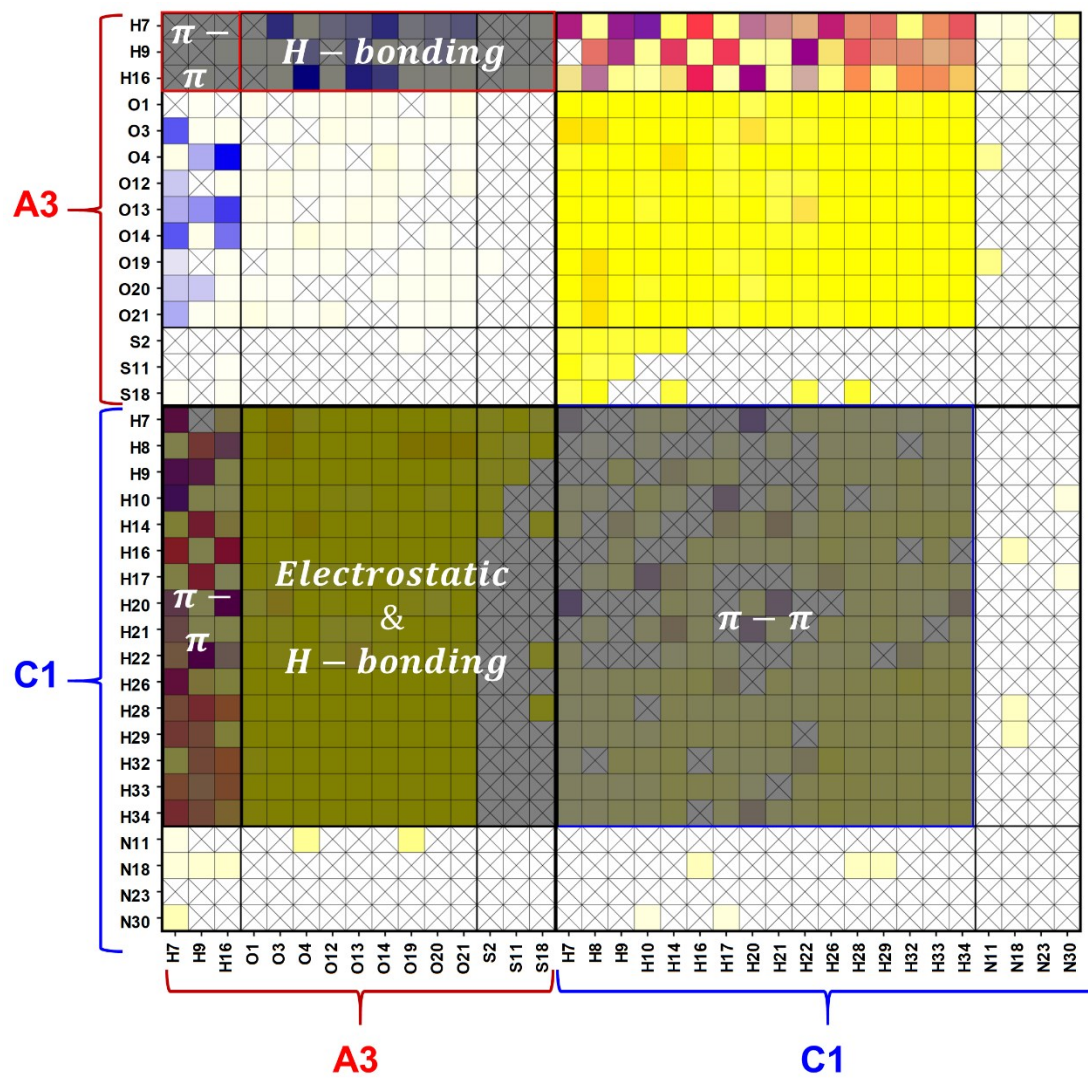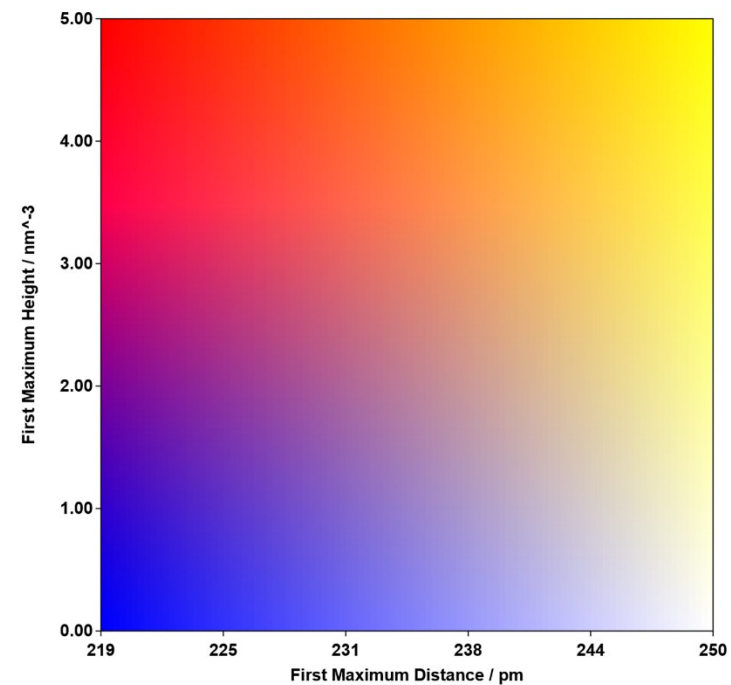

**Figure S5.** Connection matrices (CMat) corresponding to the C1-based ILs with three different anions (top: A1C1; middle: A2C1; and bottom: A3C1). The color in each square represents both the peak height and the distance to the first maximum in the corresponding RDF (for color scale, see the right-hand side). The text in the shaded regions indicate the dominant interaction between the counterions (black rectangle), anion:anion (red rectangle), and cation:cation (blue rectangle). The individual grids are labeled according to the assignments shown in Table S1.

In the CMat analyses show in Figure S5, we consider all non-carbon atoms of the anions and cations, and each matrix is diagonally symmetric. For each of the matrix elements, TRAVIS internally computes an RDF and extracts the distance and height of the first maximum.<sup>5</sup> Herein, we generally classify the interactions as belonging to one of three categories: (i)  *$\pi$ - $\pi$  stacking*: interaction of H atoms between co-ions or counter-ions (H atoms mainly associated with the C-rings), (ii) *electrostatic & H-bonding*: the interactions of hydrogen bond acceptors (H atoms) with hydrogen bond donors (N, O, F and S atoms) between counter-ions, and (iii) *H-bonding*: interactions of H-bond acceptors with H-bond donors between co-ions. Both the distance and the height of the first RDF maximum are color-coded in the CMat figures, *e.g.*, red indicates strong interaction (short distance and large maximum height), yellow corresponds to medium interaction (large maximum height but long distance), and blue indicates weak interaction (short distance but small maximum height).



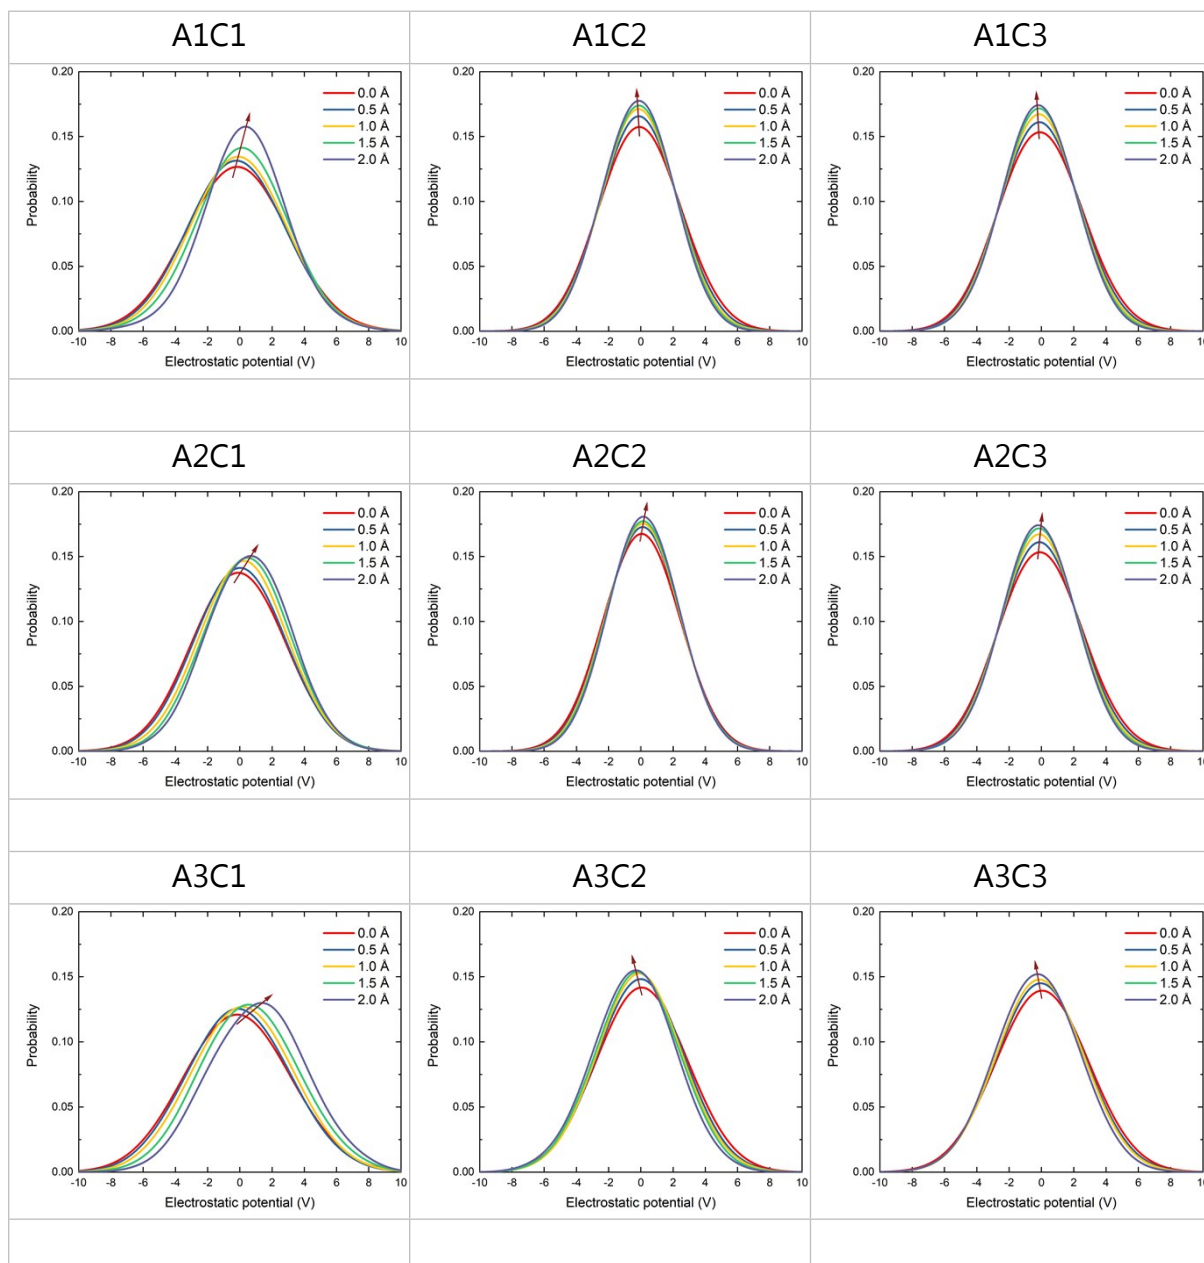

**Figure S6.** Relative probability of the electrostatic potential within all ILs solvent cavities at 300 K. The curves correspond to incremental increases in the test probe size, ranging from 0.0 Å to 2.0 Å. The arrow shows the trend in the overall ESP ( $\bar{V}$ ) as the probe size increases.

**Electrostatic potential distribution of CO<sub>2</sub> calculated from DFT in Gaussian<sup>6</sup> and analyzed by Multiwfn<sup>7</sup>**

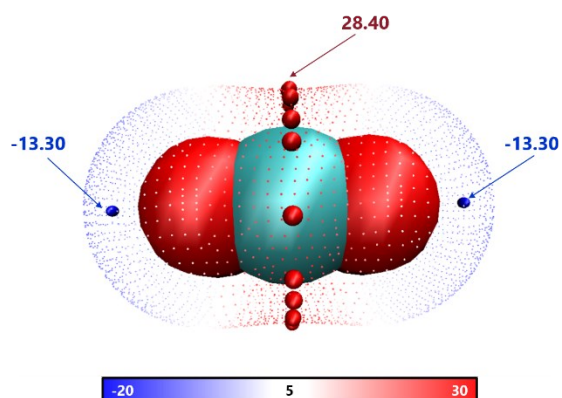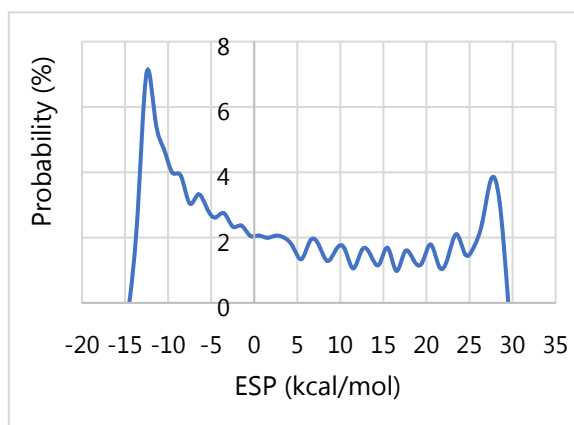

**Figure S7.** Electrostatic potential distribution (units of kcal/mol) of CO<sub>2</sub> in the gas phase. Left: ESP-mapped molecular vdW surface ( $\rho = 0.001$  e/Bohr<sup>3</sup> isosurface). The local ESP values are represented as blue and red spheres, indicating negative and positive regions, respectively. The possible global maxima and minima on the surface are labeled in red and blue, respectively. Right: electrostatic potential distribution of CO<sub>2</sub>.

**Optimized structures for CO<sub>2</sub> absorption within ILs after MD/GCMC simulation.**

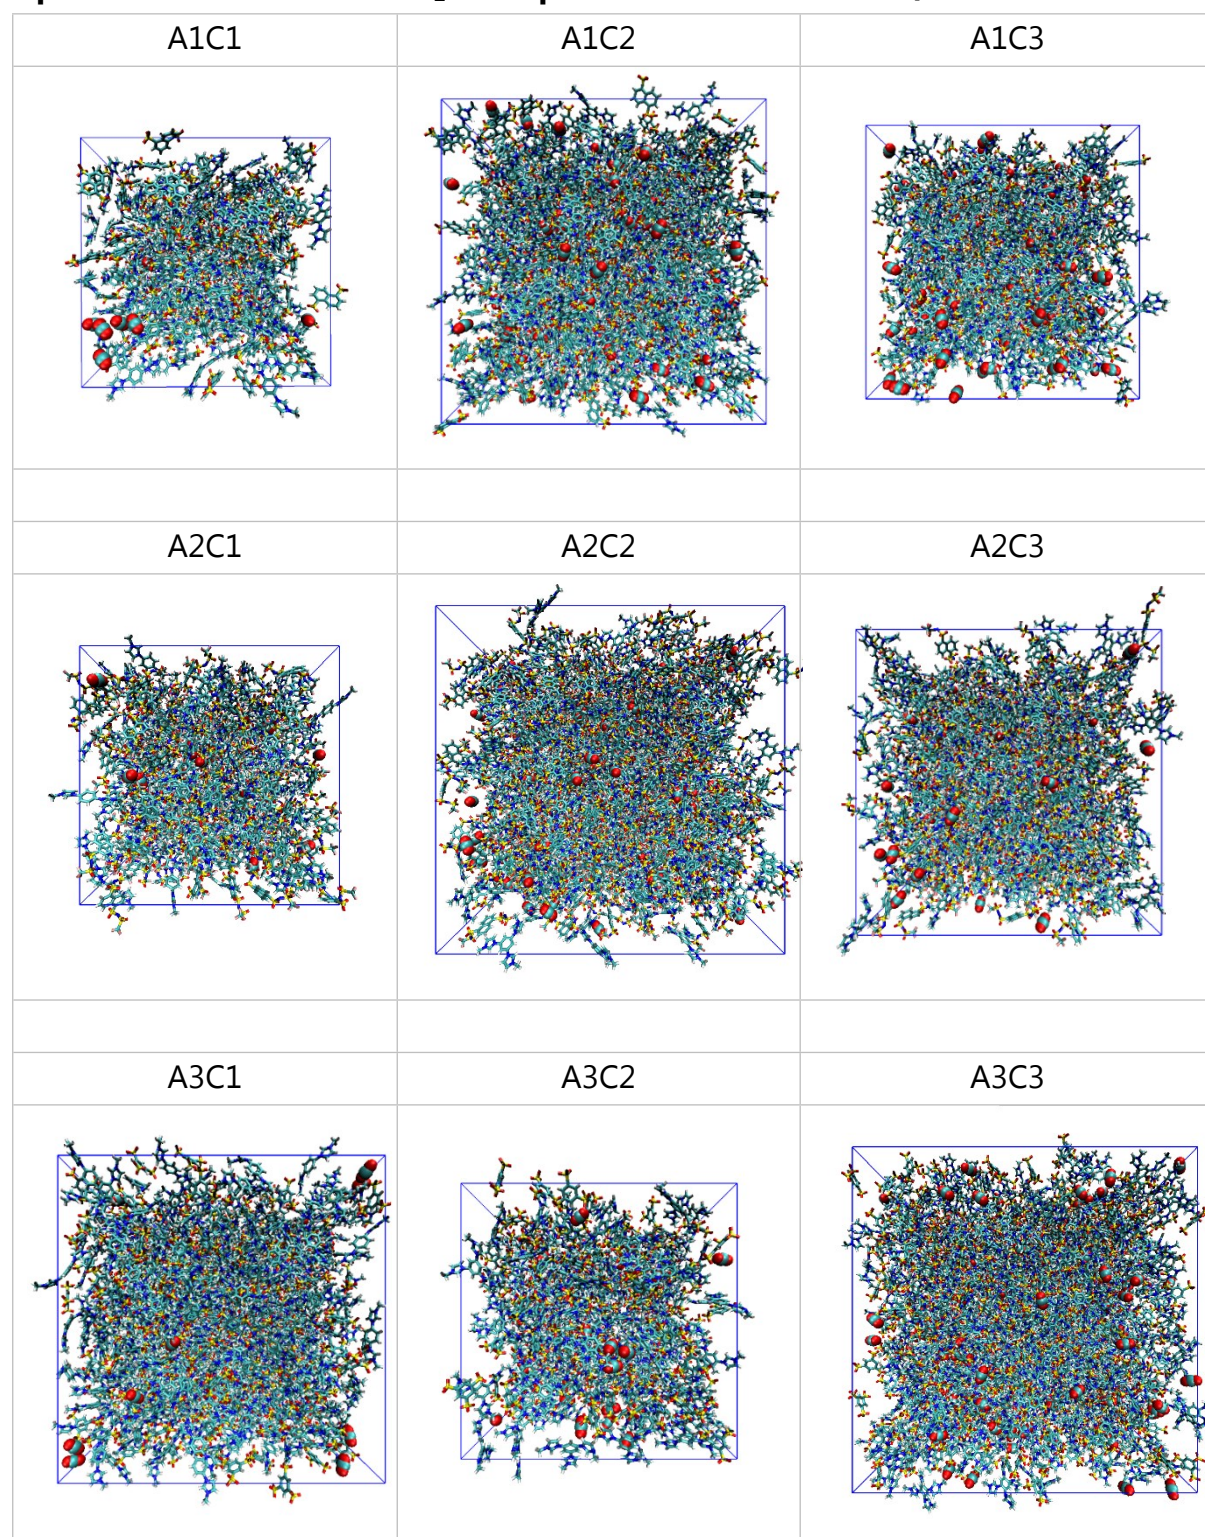

**Figure S8.** Representative snapshots of CO<sub>2</sub> absorbed within ILs after MD/GCMC simulation.

## References:

1. Hirshfeld, F. L., Bonded-Atom Fragments for Describing Molecular Charge Densities. *Theor. Chim. Acta* **1977**, *44*, 129-138.
2. Canongia Lopes, J. N.; Pádua, A. A., Molecular Force Field for Ionic Liquids Composed of Triflate or Bistriflylimide Anions. *J. Phys. Chem. B* **2004**, *108*, 16893-16898.
3. Weinhold, F.; Landis, C. R., Natural Bond Orbitals and Extensions of Localized Bonding Concepts. *Chem. Educ. Res. Pract.* **2001**, *2*, 91-104.
4. Dodda, L. S.; Vilseck, J. Z.; Cutrona, K. J.; Jorgensen, W. L., Evaluation of CM5 Charges for Nonaqueous Condensed-Phase Modeling. *J. Chem. Theory Comput.* **2015**, *11*, 4273-4282.
5. Brehm, M.; Thomas, M.; Gehrke, S.; Kirchner, B., TRAVIS—A Free Analyzer for Trajectories from Molecular Simulation. *J. Chem. Phys.* **2020**, *152*, 164105.
6. Frisch, M.; Trucks, G. W.; Schlegel, H. B.; Scuseria, G. E.; Robb, M. A.; Cheeseman, J. R.; Scalmani, G.; Barone, V.; Mennucci, B.; Petersson, G.; et al., Gaussian 09, Revision D. 01. *Gaussian, Inc.* **2009**, Wallingford, CT.
7. Lu, T.; Chen, F., Multiwfn: A Multifunctional Wavefunction Analyzer. *J. Comput. Chem.* **2012**, *33*, 580-592.
8. Kumari, R.; Kumar, R.; Open Source Drug Discovery, C.; Lynn, A., g\_mmpbsa-A GROMACS Tool for High-Throughput MM-PBSA Calculations. *J. Chem. Inf. Model.* **2014**, *54*, 1951-1962.
9. Bernales, V. S.; Marenich, A. V.; Contreras, R.; Cramer, C. J.; Truhlar, D. G., Quantum Mechanical Continuum Solvation Models for Ionic Liquids. *J. Phys. Chem. B* **2012**, *116*, 9122-9129.
10. Marenich, A. V.; Cramer, C. J.; Truhlar, D. G., Universal Solvation Model Based on Solute Electron Density and on a Continuum Model of the Solvent Defined by the Bulk Dielectric Constant and Atomic Surface Tensions. *J. Phys. Chem. B* **2009**, *113*, 6378-6396.
